# Supplementary material for: Small Molecule Targeting Immune Cells: A Novel Approach for Cancer Treatment
Source: MDPI journal article supplement (doi:10.3390/biomedicines11102621), 2023-09-24
Supplement: s1 [file s1]

**Supplementary Table S1. Clinical studies of combination therapy for cancer treatment**

| <b>Combination studies</b>                                                              | <b>Phase</b> | <b>Cancer type</b>                                                                                                                                         | <b>Registration number</b> | <b>Status</b> | <b>Inventors</b>                                          |
|-----------------------------------------------------------------------------------------|--------------|------------------------------------------------------------------------------------------------------------------------------------------------------------|----------------------------|---------------|-----------------------------------------------------------|
| DNX2401<br>Temozolomide                                                                 | I            | Glioblastoma multiforme<br>Recurrent tumor                                                                                                                 | NCT01956734                | Completed     | Clinica<br>universidad de<br>Navarra                      |
| CVA21<br>Ipilimumab                                                                     | I            | Uveal melanoma<br>Liver metastases                                                                                                                         | NCT03408587                | Completed     | Icahn school of<br>medicine at<br>Mount Sinai             |
| Pexa-Vec<br>Ipilimumab                                                                  | I            | Metastatic tumor<br>Advanced tumor                                                                                                                         | NCT02977156                | Completed     | Centre Leon<br>Berard                                     |
| GL-ONC1<br>Radiation<br>Cisplatin                                                       | I            | Head and neck cancer                                                                                                                                       | NCT01584284                | Completed     | Moore's UC San<br>Diego cancer<br>center                  |
| REOLYSIN®<br>Irinotecan<br>Leucovorin<br>Fluorouracil (5-FU)<br>Bevacizumab             | I            | KRAS mutant metastatic<br>colorectal cancer                                                                                                                | NCT01274624                | Completed     | Oncolytics<br>biotech and<br>montefiore<br>medical center |
| REOLYSIN®<br>Gemcitabine<br>Irinotecan<br>Leucovorin<br>5-fluorouracil<br>Pembrolizumab | I            | Pancreatic<br>adenocarcinoma                                                                                                                               | NCT02620423                | Completed     | Cancer therapy<br>and research<br>center at<br>UTHSCSA    |
| GL-ONC1<br>Bevacizumab                                                                  | I/II         | Ovarian cancer<br>Peritoneal<br>carcinomatosis<br>Fallopian tube cancer                                                                                    | NCT02759588                | Completed     | Genelux<br>corporation                                    |
| Ad-MAGEA3<br>MG1-MAGEA3<br>Pembrolizumab                                                | I/II         | Non-small cell<br>lung cancer                                                                                                                              | NCT02879760                | Completed     | Turnstone<br>biologics, Corp.                             |
| TBI-1401(HF10)<br>Ipilimumab                                                            | II           | Melanoma stage III<br>Melanoma stage IV                                                                                                                    | NCT03153085                | Completed     | National cancer<br>center hospital                        |
| DNX-2401<br>Pembrolizumab                                                               | II           | Brain cancer<br>Brain neoplasm<br>Glioma<br>Glioblastoma<br>Gliosarcoma<br>Malignant brain tumor<br>Neoplasm,<br>Neuroepithelial<br>neuroectodermal tumors | NCT02798406                | Completed     | DNAtrix, Inc.                                             |

|                                                |      |                                                                                                                                                                                                                                                      |             |            |                                                      |
|------------------------------------------------|------|------------------------------------------------------------------------------------------------------------------------------------------------------------------------------------------------------------------------------------------------------|-------------|------------|------------------------------------------------------|
|                                                |      | Neoplasm by histologic type<br>Nerve tissue nervous system diseases                                                                                                                                                                                  |             |            |                                                      |
| HF10<br>Ipilimumab                             | II   | Malignant melanoma                                                                                                                                                                                                                                   | NCT02272855 | Completed  | University of Utah                                   |
| RT-01<br>Nivolumab                             | I    | Advanced solid tumor                                                                                                                                                                                                                                 | NCT05228119 | Recruiting | The affiliated hospital of Xuzhou medical university |
| RT-01<br>Nivolumab                             | I    | Advanced solid tumor                                                                                                                                                                                                                                 | NCT05122572 | Recruiting | Wuxi People's hospital                               |
| ASP9801<br>Pembrolizumab                       | I    | Metastatic cancer<br>Solid tumor<br>Advanced cancer                                                                                                                                                                                                  | NCT03954067 | Recruiting | Astellas pharma global development, Inc.             |
| RP3<br>Nivolumab                               | I    | Advanced solid tumor                                                                                                                                                                                                                                 | NCT04735978 | Recruiting | Replimune Inc.                                       |
| Enadenotucirev<br>Capecitabine<br>Radiotherapy | I    | Locally advanced rectal cancer                                                                                                                                                                                                                       | NCT03916510 | Recruiting | University of Oxford                                 |
| TILT-123<br>Avelumab                           | I    | Melanoma<br>Head and neck squamous cell Carcinoma                                                                                                                                                                                                    | NCT05222932 | Recruiting | Docrates cancer center                               |
| OVV-01 injection<br>Pembrolizumab              | I    | Neoplasms                                                                                                                                                                                                                                            | NCT04787003 | Recruiting | North China petroleum bureau general hospital        |
| TBio-6517<br>Pembrolizumab                     | I/II | Solid tumor<br>Microsatellite stable colorectal cancer<br>HPV-positive oropharyngeal squamous cell carcinoma<br>Cervical cancer<br>Melanoma (skin)<br>Cutaneous squamous cell carcinoma<br>Mesothelioma<br>Renal cell carcinoma<br>Oropharynx cancer | NCT04301011 | Recruiting | Turnstone biologics                                  |
| Delolimogene<br>Mupadenorepvec<br>Gemcitabine  | I/II | Pancreatic cancer                                                                                                                                                                                                                                    | NCT02705196 | Recruiting | Lokon pharma AB                                      |

|                                                                                                                                                                                                                 |      |                                                                                                                                                                                                                                                    |             |                          |                                                              |
|-----------------------------------------------------------------------------------------------------------------------------------------------------------------------------------------------------------------|------|----------------------------------------------------------------------------------------------------------------------------------------------------------------------------------------------------------------------------------------------------|-------------|--------------------------|--------------------------------------------------------------|
| Nab-Paclitaxel<br>Atezolizumab                                                                                                                                                                                  |      |                                                                                                                                                                                                                                                    |             |                          |                                                              |
| Olvimulogene<br>Nanivacirepvec<br>Pcarboplatin<br>(preferred) or<br>Cisplatin<br>Gemcitabine,<br>Taxane (Paclitaxel,<br>Docetaxel or<br>Nab-Paclitaxel) or<br>Pegylated liposomal<br>Doxorubicin<br>Bevacizumab | III  | Platinum-resistant<br>ovarian cancer<br>Platinum-refractory<br>ovarian cancer<br>Fallopian tube cancer<br>Primary<br>peritoneal cancer<br>High-grade serous<br>ovarian cancer<br>Endometrioid<br>ovarian cancer<br>Ovarian clear cell<br>carcinoma | NCT05281471 | Recruiting               | Genelux<br>corporation<br>GOG foundation                     |
| MEDI5395<br>Durvalumab                                                                                                                                                                                          | I    | Advanced solid tumors                                                                                                                                                                                                                              | NCT03889275 | Active not<br>recruiting | MedImmune<br>LLC                                             |
| ONCR-177<br>Pembrolizumab                                                                                                                                                                                       | I    | Melanoma<br>Solid tumor<br>Squamous cell carcinoma<br>of head and neck<br>Breast cancer<br>Advanced solid tumor<br>Triple negative<br>breast cancer<br>Colorectal carcinoma<br>Non-melanoma<br>skin cancer<br>Liver metastases                     | NCT04348916 | Active not<br>recruiting | Oncorus, Inc.                                                |
| ADV/HSV-tk<br>Valacyclovir<br>Stereotactic body<br>radiation therapy<br>Pembrolizumab                                                                                                                           | I    | Metastatic non-small cell<br>lung cancer<br>Metastatic triple-<br>negative breast cancer                                                                                                                                                           | NCT03004183 | Active not<br>recruiting | Houston<br>methodist<br>cancer center                        |
| TBI-1401(HF10)<br>Gemcitabine<br>Nab-paclitaxel<br>TS-1                                                                                                                                                         | I    | Pancreatic cancer stage<br>III<br>Pancreatic cancer stage<br>IV                                                                                                                                                                                    | NCT03252808 | Active not<br>recruiting | Takara Bio Inc.                                              |
| Pexastimogene<br>Devacirepvec (Pexa-<br>Vec)<br>Cemiplimab                                                                                                                                                      | I/II | Renal cell carcinoma                                                                                                                                                                                                                               | NCT03294083 | Active not<br>recruiting | SillaJen, Inc.<br>Regeneron<br>pharmaceuticals               |
| Talimogene<br>laherparepvec<br>Paclitaxel                                                                                                                                                                       | I/II | Ductal carcinoma<br>Invasive breast<br>carcinoma<br>Invasive ductal breast<br>carcinoma                                                                                                                                                            | NCT02779855 | Active not<br>recruiting | H. Lee Moffitt<br>cancer center<br>and research<br>institute |

|                                                                                 |      |                                                                                                                                                                                           |             |                         |                                                      |
|---------------------------------------------------------------------------------|------|-------------------------------------------------------------------------------------------------------------------------------------------------------------------------------------------|-------------|-------------------------|------------------------------------------------------|
| Durvalumab<br>Tremelimumab<br>Pexa-Vec                                          | I/II | Colorectal cancer<br>Colorectal carcinoma<br>Colorectal adenocarcinoma<br>Refractory cancer<br>Colorectal neoplasms                                                                       | NCT03206073 | Active not recruiting   | National cancer institute (NCI)                      |
| Paclitaxel<br>Pelareorep<br>Avelumab                                            | II   | Breast cancer metastatic                                                                                                                                                                  | NCT04215146 | Active not recruiting   | Oncolytics biotech<br>PrECOG, LLC.                   |
| Recombinant oncolytic HSV-2<br>Recombinant humanized anti-PD-1 mAb<br>Radiation | I    | Melanoma stage IV                                                                                                                                                                         | NCT05068453 | Not yet recruiting      | Peking university cancer hospital & institute        |
| Recombinant oncolytic HSV-2<br>Axitinib                                         | I    | Melanoma stage IV                                                                                                                                                                         | NCT05070221 | Not yet recruiting      | Peking university cancer hospital & institute        |
| Revottack<br>PD-1                                                               | I    | Advanced solid tumor                                                                                                                                                                      | NCT05644509 | Not yet recruiting      | The affiliated hospital of Xuzhou medical university |
| G207<br>Radiation (5 Gy single dose)                                            | II   | High-grade glioma<br>Glioblastoma multiforme<br>Malignant glioma of the brain<br>Anaplastic astrocytoma of the brain<br>High-grade glioma<br>Anaplastic glioma<br>Giant cell glioblastoma | NCT04482933 | Not yet recruiting      | University of Alabama at Birmingham                  |
| Lenalidomide or Pomalidomide<br>REOLYSIN                                        | I    | Multiple myeloma                                                                                                                                                                          | NCT03015922 | Unknown                 | St. James's university hospital                      |
| TG6002<br>5-flucytosine                                                         | I/II | Glioblastoma<br>Brain cancer                                                                                                                                                              | NCT03294486 | Unknown                 | Assistance Publique - Hôpitaux de Paris              |
| H101<br>Radiation                                                               | -    | Genital neoplasms                                                                                                                                                                         | NCT05051696 | Enrolling by invitation | First affiliated hospital Xi'an Jiaotong university  |

**Supplementary Table S2. Recent FDA-approved small molecules targeting essential pathways for cancer treatment**

| Drug name | Active small molecule | Structure | Target                            | Cancer type                                         | Approval date |
|-----------|-----------------------|-----------|-----------------------------------|-----------------------------------------------------|---------------|
| Balversa  | Erdafitinib           |           | pan-EGFR inhibitor                | Advanced and metastatic bladder cancer              | 4/12/2019     |
| Piqray    | Alpelisib             |           | PI3K- $\alpha$ inhibitor          | Breast cancer                                       | 5/24/2019     |
| Xpovio    | Selinexor             |           | XPO1 inhibitor                    | Relapsed and refractory myeloma                     | 7/3/2019      |
| Nubeqa    | Darolutamide          |           | AR antagonist                     | Non-metastatic castration resistant prostate cancer | 07/30/2019    |
| Turalio   | Pexidartinib          |           | CSF1R inhibitor                   | Symptomatic tenosynovial giant cell tumor           | 08/02/2019    |
| Rozlytrek | Entrectinib           |           | ROS1/TRK/ALK inhibitor            | Metastatic non-small cell lung cancer               | 08/15/2019    |
| Inrebic   | Fedratinib            |           | JAK-2 inhibitor                   | High-risk primary and secondary myelofibrosis       | 08/16/2019    |
| Brukina   | Zanubrutinib          |           | BTK inhibitor                     | Mantle cell lymphoma                                | 11/14/2019    |
| Tazverik  | Tazemetostat          |           | EZH2 methyl transferase inhibitor | Epitheloid carcinoma                                | 1/23/2020     |

|          |                             |                                                                                     |                                                  |                                      |            |
|----------|-----------------------------|-------------------------------------------------------------------------------------|--------------------------------------------------|--------------------------------------|------------|
| Koselgo  | Selumetinib                 | 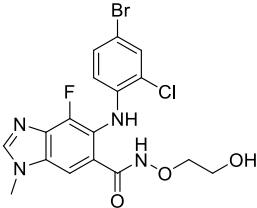   | MEK1/MEK2<br>kinase inhibitor                    | Neurofibromatosis type 1             | 4/10/2020  |
| Retevmo  | Selpercatinib               |    | RET fusion<br>kinase Inhibitor                   | NSCLC, Thyroid cancer                | 5/8/2020   |
| Zepzelca | Iurbinectedin               |    | DNA<br>alkylating<br>agent                       | Metastatic small cell lung<br>cancer | 6/15/2020  |
| Inqovil  | Cedazuridine/<br>Decitabine |    | Nucleoside<br>cytidine<br>deaminase<br>inhibitor | Myelodysplastic<br>syndromes         | 7/7/2020   |
| Orgovyx  | Relugolix                   |   | GnRH<br>hormone<br>receptor<br>antagonist        | Advanced prostate cancer             | 12/18/2020 |
| Tepmetko | Tepotinib                   |  | MET kinase<br>inhibitor                          | NSCLC                                | 2/3/2021   |
| Ukoniq   | Umbralisib                  |  | PI3Kδ and<br>CK1ε Kinase<br>inhibitor            | Follicular lymphoma                  | 2/5/2021   |
| Cosela   | Trilaciclib                 |  | CDK-4 and<br>CDK-5 Kinase<br>inhibitor           | SCLC                                 | 2/12/2021  |

|           |                                        |                                                                                     |                                          |                      |            |
|-----------|----------------------------------------|-------------------------------------------------------------------------------------|------------------------------------------|----------------------|------------|
| Pepaxto   | Melphalan-flufenamide                  | 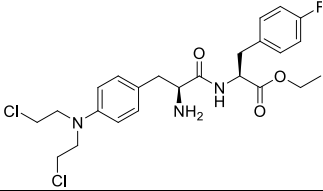   | Conjugated alkylating agent              | Multiple myeloma     | 2/26/2021  |
| Fotivda   | Tivozanib                              |    | Pan-VEGFR kinase inhibitor               | Renal cell carcinoma | 3/10/2021  |
| Lumakras  | Sotorasib                              |    | KRAS GTPase inhibitor                    | NSCLC                | 5/21/2021  |
| Truseltiq | Infigratinib                           |    | Pan-FGFR kinase inhibitor                | Cholangiocarcinoma   | 5/28/2021  |
| Exkivity  | Mobocertinib                           |   | EGF R exon 20 insertion kinase inhibitor | NSCLC                | 9/15/2021  |
| Scemblix  | Asciminib                              |  | ABL/BCR-ABL1 kinase inhibitor            | Myeloid leukemia     | 10/29/2021 |
| Pluvicto  | Lutetium (177Lu) vipivotide tetraxetan |  | PSMA targeted radiotherapy               | Prostate cancer      | 3/23/2022  |
| Vonjo     | Pacritinib                             |  | JAK-2/IRAK1 inhibitor                    | Myelofibrosis        | 2/28/2022  |

|           |              |                                                                                   |                 |                                             |            |
|-----------|--------------|-----------------------------------------------------------------------------------|-----------------|---------------------------------------------|------------|
| Lytgobi   | Futibatinib  | 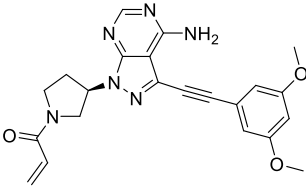 | FGFR2 inhibitor | Intrahepatic cholangiocarcinoma             | 9/30/2022  |
| Rezlidhia | Olutasidenib |  | IDG1 inhibitor  | Relapsed/ refractory acute myeloid leukemia | 12/1/2022  |
| Krazati   | Adagrasib    |  | KRAS inhibitor  | Advanced or metastatic NSCLC                | 12/12/2022 |
